# Supplementary material for: Experimental and computational studies of cationic Gemini surfactants as corrosion inhibitors for carbon steel in 15% HCl
Source: Royal Society of Chemistry journal article supplement (doi:10.1039/d4cp03616f), 2024-12-16
Supplement: d4cp03616f1.pdf [file d4cp03616f1.pdf]

## Supporting Information

### **Experimental and computational studies of the influence of cationic Gemini surfactant as corrosion inhibitors for carbon steel in 15% HCl**

Chenxu Wang<sup>a</sup>, Erlong Yang<sup>a</sup>

*College of petroleum Engineering, Northeast Petroleum University, Daqing,*

*Heilongjiang Province, China*

## Supplementary figures and tables

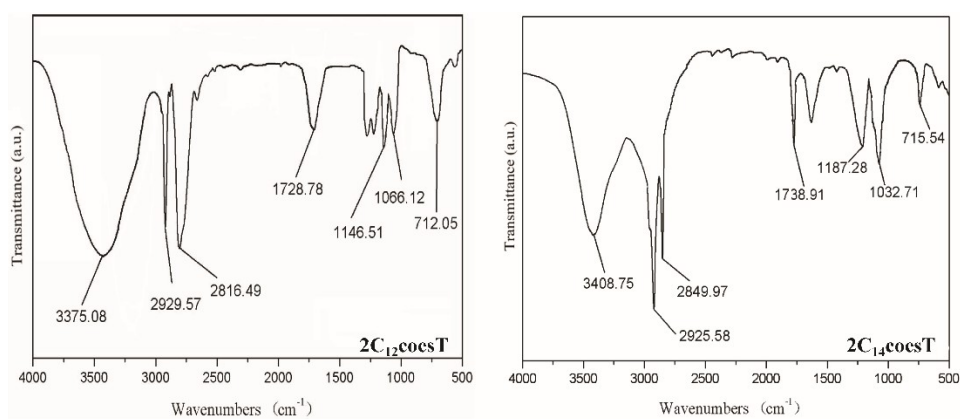

**Fig. S1** The FT-IR spectra of  $2C_ncoesT$  ( $n = 12, 14$ )

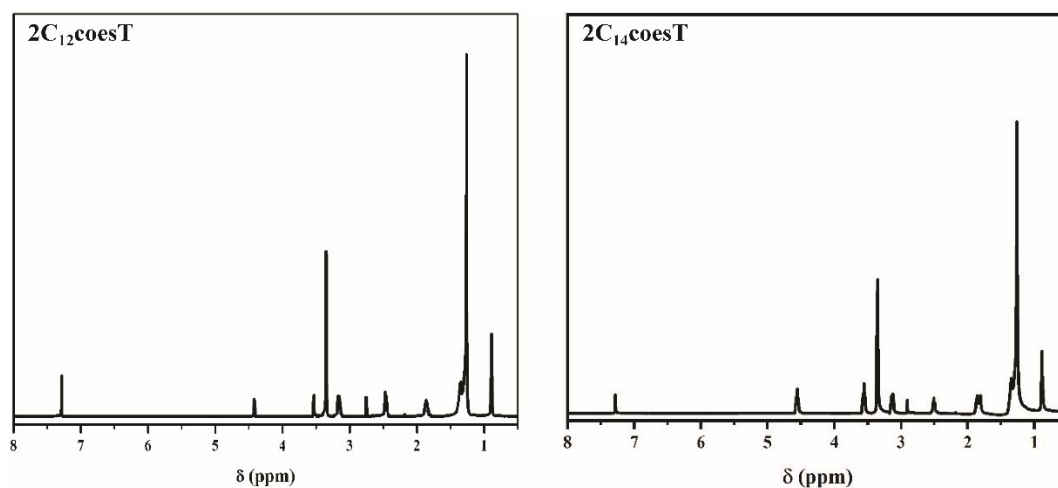

**Fig. S2** The  $^1H$  NMR spectra of  $2C_ncoesT$  ( $n = 12, 14$ )

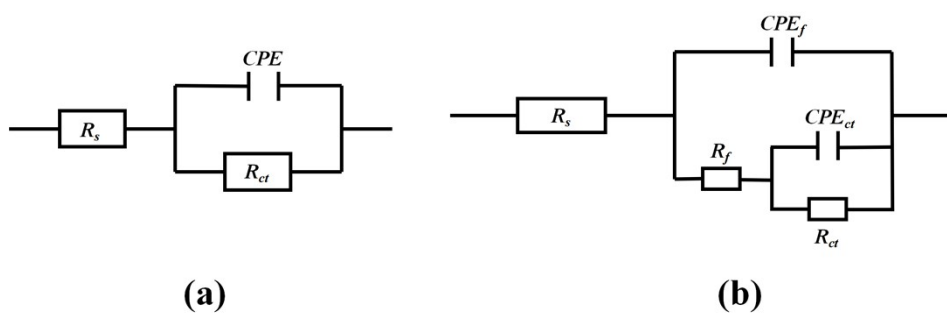

**Fig. S3** Equivalent circuit model applied to fit the obtained impedance data.

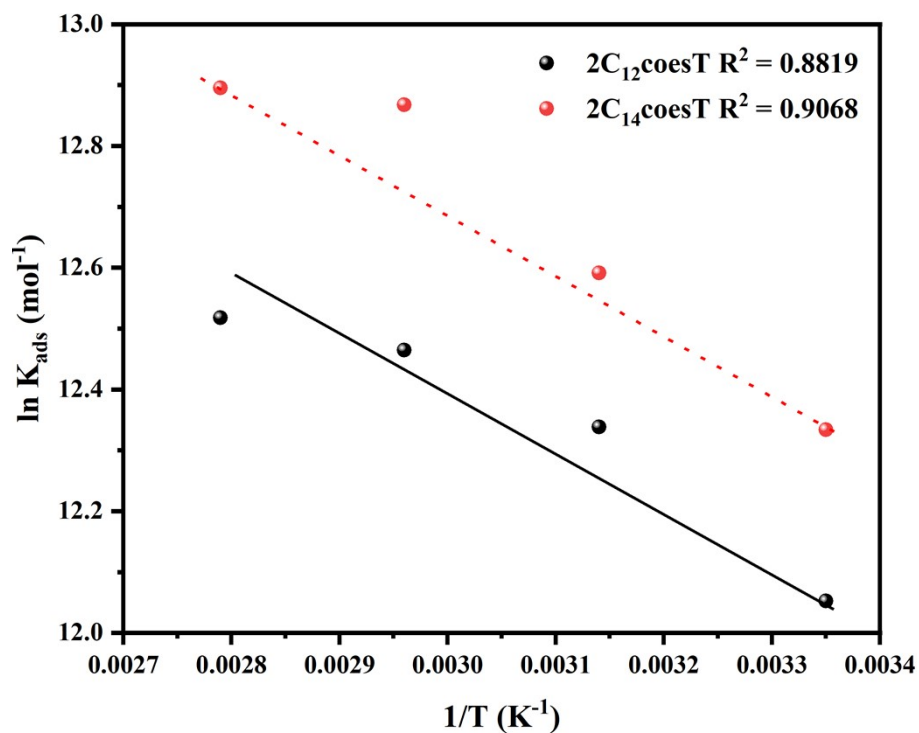

**Fig. S4** The relationship between  $\ln K_{ads}$  and  $(1/T)$  for A3 carbon steel in 15% HCl solution with different concentrations of  $2C_{12}coesT$  and  $2C_{14}coesT$ .

**Table S1** The Fukui indices of surfactant I and II.

| Surfactant I |                     |                      |              | Surfactant II |                     |                      |              |
|--------------|---------------------|----------------------|--------------|---------------|---------------------|----------------------|--------------|
| Atom         | Nucleophilic attack | Electrophilic attack | $\Delta f_k$ | Atom          | Nucleophilic attack | Electrophilic attack | $\Delta f_k$ |
|              | $f_k^+$             | $f_k^-$              |              |               | $f_k^+$             | $f_k^-$              |              |
| O (1)        | 0.045               | 0.004                | 0.041        | O (1)         | 0.047               | 0.004                | 0.043        |
| C (2)        | 0.144               | 0.007                | 0.137        | C (2)         | 0.153               | 0.007                | 0.146        |
| C (3)        | -0.024              | -0.007               | -0.017       | C (3)         | -0.023              | -0.006               | -0.017       |
| C (4)        | -0.013              | -0.042               | 0.029        | C (4)         | -0.013              | -0.043               | 0.03         |
| S (5)        | 0.034               | 0.625                | -0.591       | S (5)         | 0.034               | 0.628                | -0.594       |
| C (6)        | -0.013              | -0.042               | 0.029        | C (6)         | -0.014              | -0.043               | 0.029        |
| C (7)        | -0.024              | -0.007               | -0.017       | C (7)         | -0.024              | -0.005               | -0.019       |
| C (8)        | 0.163               | 0.007                | 0.156        | C (8)         | 0.154               | 0.007                | 0.147        |

|        |        |        |        |        |        |        |        |
|--------|--------|--------|--------|--------|--------|--------|--------|
| O (9)  | 0.049  | 0.004  | 0.045  | O (9)  | 0.047  | 0.004  | 0.043  |
| O (10) | 0.113  | 0.01   | 0.103  | O (10) | 0.117  | 0.01   | 0.107  |
| O (11) | 0.122  | 0.011  | 0.111  | O (11) | 0.118  | 0.01   | 0.108  |
| C (12) | -0.002 | 0      | -0.002 | C (12) | -0.003 | 0      | -0.003 |
| C (13) | -0.015 | -0.001 | -0.014 | C (13) | -0.015 | -0.001 | -0.014 |
| C (14) | -0.002 | 0      | -0.002 | C (14) | -0.003 | 0      | -0.003 |
| C (15) | -0.015 | -0.001 | -0.014 | C (15) | -0.015 | -0.001 | -0.014 |
| C (16) | -0.002 | 0      | -0.002 | C (16) | -0.002 | 0      | -0.002 |
| N (17) | -0.002 | 0      | -0.002 | N (17) | -0.002 | 0      | -0.002 |
| C (18) | -0.001 | 0      | -0.001 | C (18) | -0.001 | 0      | -0.001 |
| C (19) | -0.002 | 0      | -0.002 | C (19) | -0.002 | 0      | -0.002 |
| C (20) | -0.002 | 0      | -0.002 | C (20) | -0.002 | 0      | -0.002 |
| N (21) | -0.002 | 0      | -0.002 | N (21) | -0.002 | 0      | -0.002 |
| C (22) | -0.002 | 0      | -0.002 | C (22) | -0.002 | 0      | -0.002 |
| C (23) | -0.001 | 0      | -0.001 | C (23) | -0.001 | 0      | -0.001 |
| C (24) | -0.001 | 0      | -0.001 | C (24) | -0.001 | 0      | -0.001 |
| C (25) | 0      | 0      | 0      | C (25) | 0      | 0      | 0      |
| C (26) | 0      | 0      | 0      | C (26) | 0      | 0      | 0      |
| C (27) | 0      | 0      | 0      | C (27) | 0      | 0      | 0      |
| C (28) | 0      | 0      | 0      | C (28) | 0      | 0      | 0      |
| C (29) | 0      | 0      | 0      | C (29) | 0      | 0      | 0      |
| C (30) | 0      | 0      | 0      | C (30) | 0      | 0      | 0      |
| C (31) | 0      | 0      | 0      | C (31) | 0      | 0      | 0      |
| C (32) | 0      | 0      | 0      | C (32) | 0      | 0      | 0      |
| C (33) | 0      | 0      | 0      | C (33) | 0      | 0      | 0      |
| C (34) | 0      | 0      | 0      | C (34) | 0      | 0      | 0      |
| C (35) | -0.001 | 0      | -0.001 | C (35) | -0.001 | 0      | -0.001 |
| C (36) | 0      | 0      | 0      | C (36) | 0      | 0      | 0      |
| C (37) | 0      | 0      | 0      | C (37) | 0      | 0      | 0      |

|        |   |   |   |         |   |   |   |
|--------|---|---|---|---------|---|---|---|
| C (38) | 0 | 0 | 0 | C (38)  | 0 | 0 | 0 |
| C (39) | 0 | 0 | 0 | C (39)  | 0 | 0 | 0 |
| C (40) | 0 | 0 | 0 | C (40)  | 0 | 0 | 0 |
| C (41) | 0 | 0 | 0 | C (41)  | 0 | 0 | 0 |
| C (42) | 0 | 0 | 0 | C (42)  | 0 | 0 | 0 |
| C (43) | 0 | 0 | 0 | C (43)  | 0 | 0 | 0 |
| C (44) | 0 | 0 | 0 | C (44)  | 0 | 0 | 0 |
| C (45) | 0 | 0 | 0 | C (45)  | 0 | 0 | 0 |
|        |   |   |   | C (122) | 0 | 0 | 0 |
|        |   |   |   | C (123) | 0 | 0 | 0 |
|        |   |   |   | C (124) | 0 | 0 | 0 |
|        |   |   |   | C (125) | 0 | 0 | 0 |

---
